## **Kv1 channels regulate variations in spike patterning and temporal reliability in the avian cochlear nucleus angularis**

**Authors:**

James F. Baldassano  
Katrina M. MacLeod

**Affiliation:**

Department of Biology  
University of Maryland, College Park  
College Park, MD 20742

**Running head:** Kv1 regulation of spiking in nucleus angularis

**Corresponding author:**

Katrina MacLeod  
Department of Biology  
University of Maryland  
College Park, MD 20742  
(301) 405-7174 (phone)  
(301) 314-9358 (fax)  
[macleod@umd.edu](mailto:macleod@umd.edu)

Keywords: Action potential; Spike initiation; potassium channel; chick; coincidence detection



## 1 **Abstract**

2           Diverse physiological phenotypes in a neuronal population can broaden the range of  
3 computational capabilities within a brain region. The avian cochlear nucleus angularis (NA) contains a  
4 heterogeneous population of neurons whose variation in intrinsic properties results in  
5 electrophysiological phenotypes with a range of sensitivities to temporally modulated input. The low-  
6 threshold potassium conductance ( $G_{KLT}$ ) is a key feature of neurons involved in fine temporal structure  
7 coding for sound localization but a role for these channels in intensity or spectrotemporal coding has not  
8 been established. To determine whether  $G_{KLT}$  affects the phenotypical variation and temporal properties  
9 of NA neurons, we applied dendrotoxin (DTX), a potent antagonist of Kv1-type potassium channels, to  
10 chick brain stem slices in vitro during whole-cell patch clamp recordings. We found a cell-type specific  
11 subset of NA neurons were sensitive to DTX: single-spiking NA neurons were most profoundly affected,  
12 as well as a subset of tonic firing neurons. Both tonic I (phasic onset bursting) and tonic II (delayed  
13 firing) neurons showed DTX sensitivity in their firing rate and phenotypical firing pattern. Tonic III  
14 neurons were unaffected. Spike time reliability and fluctuation sensitivity measured in DTX-sensitive NA  
15 neurons was also reduced with DTX. Finally, DTX reduced spike threshold adaptation in these neurons,  
16 suggesting that  $G_{KLT}$  contributes to the temporal properties that allow coding of rapid changes in the  
17 inputs to NA neurons. These results suggest that variation in Kv1 channel expression may be a key factor  
18 in functional diversity in the avian cochlear nucleus.

19           Abstract word count: 244

20

## 21 **New and noteworthy**

22           The dendrotoxin-sensitive voltage-gated potassium conductance typically associated with  
23 neuronal coincidence detection the timing pathway for sound localization is demonstrated to affect

24 spiking patterns and temporal input sensitivity in the intensity pathway in the avian auditory brain stem.

25 The Kv1-family channels appear to be present in a subset of cochlear nucleus angularis neurons,

26 regulate spike threshold dynamics underlying high-pass membrane filtering, and contribute to intrinsic

27 firing diversity.

28

29

## 30 Introduction

31 Neurons in early sensory nuclei must process a wealth of incoming information to extract  
32 features that are relevant to their particular circuit. The avian cochlear nucleus is composed of two  
33 divisions, nucleus magnocellularis (NM) and nucleus angularis (NA), each of which extract unique  
34 information from auditory nerve activity in parallel (1). NM neurons encode timing information by  
35 phase-locking to the fine structure in the acoustic signal (2, 3), partly enabled by specialized intrinsic  
36 properties such as a large low threshold voltage-gated potassium conductance ( $G_{KLT}$ ) (4–8). This  
37 dendrotoxin (DTX)-sensitive conductance is attributed to the expression of the Kv1 family of potassium  
38 channels, particularly Kv1.1 and Kv1.2, that are prominent throughout the auditory brainstem of birds  
39 and mammals (9–15).

40 In contrast to NM, NA is classically understood to process information about sound intensity or  
41 level in service of interaural level difference computation. (3, 16–18) More broadly, however, NA  
42 neurons are also involved in spectrotemporal and amplitude modulation coding and auditory envelope  
43 processing.(19, 20) The neuronal population in NA shows greater morphological and physiological  
44 heterogeneity than those in NM and NL (1, 21, 22). Sound-evoked responses observed in vivo in NA fall  
45 into a range of response categories, such as onset, chopper, primary-like, and “Type IV”, similar to  
46 corresponding recorded responses in the mammalian cochlear nucleus (2, 23, 24). Likewise, NA neurons  
47 display a range of electrophysiological phenotypes that likely arise from the expression of a more  
48 diverse array of ion channels (22, 25–29). Single spiking neurons in NA most closely resemble NM  
49 neurons, while a broad group of repetitively firing neurons in NA can be further subdivided according to  
50 their firing patterns to step currents in vitro: early burst firing (tonic I), late or delayed firing (tonic II) and  
51 regular spiking (tonic III) (25, 26). A DTX-sensitive conductance has been shown to be required for the  
52 single-spiking phenotype, but blocking this conductance also elevated firing rates in tonic neurons (22).

53 Along with immunohistochemical evidence for Kv1 channel protein expression in NA (10, 30), these data  
54 suggest that  $G_{KLT}$  is present and active in shaping NA neuron physiology. The ion channel basis of the  
55 different tonic phenotypes is not yet known.

56 The parallels between the heterogeneity among in vivo response types and the heterogeneity  
57 among in vitro response types suggests that intrinsic properties may have a significant effect on the  
58 transformation of auditory information. We have recently investigated type-specific variation in  
59 sensitivity to temporally modulated stimuli in the tonic neurons in vitro and shown how diversity in  
60 intrinsic properties can enhance stimulus encoding (26, 27). Temporal modulation sensitivity in vitro and  
61 bandpass feature extraction in vivo could be replicated in NA neurons using a phenomenological model  
62 of adaptive spike thresholds (19, 28). While the model was originally derived from the biophysical  
63 phenomenon of sodium channel inactivation (31), its ion channel basis in NA has not been empirically  
64 confirmed and could also be influenced by other subthreshold conductances, including  $G_{KLT}$  (32–34).

65 In this study, we used whole cell patch clamp electrophysiology and DTX to pharmacologically  
66 block  $G_{KLT}$  and test whether  $G_{KLT}$  was needed to elicit the various spiking phenotypes among the tonic  
67 neurons. We further investigated whether  $G_{KLT}$  was necessary for the temporal reliability of firing, high-  
68 pass filtering properties, and spike threshold adaptation that characterized a subset of tonic firing  
69 neurons.

70 Introduction Word count- 552

71

72

## 73 **Methods & Materials**

### 74 *Brain slice preparation*

75 All animal procedures were performed with Institutional Animal Care and Use Committee  
76 approval and according to University of Maryland guidelines on animal welfare. Chicken (*Gallus gallus*)  
77 embryos incubated to embryonic day 17-18 were cooled and rapidly decapitated, and the head section  
78 containing the brain stem blocked, placed in a chilled, oxygenated low-sodium artificial cerebrospinal  
79 fluid (ACSF)(low-Na<sup>+</sup> ACSF in mM: 97.5 NaCl, 3 KCl, 2.5 MgCl<sub>2</sub>, 26 NaHCO<sub>3</sub>, 2 CaCl<sub>2</sub>, 1.25 NaH<sub>2</sub>PO<sub>4</sub>, 10  
80 dextrose, 3 HEPES, and 230 sucrose) and dissected out of the cranium. The brain stem tissue block was  
81 mounted with cyanoacrylate glue and supported with 5% agarose gel solution. Transverse slices (250 μm  
82 thick) containing NA were cut on a vibrating tissue slicer (Leica Microsystems, Wetzlar, Germany). Slices  
83 were incubated in normal ACSF (in mM: 130 NaCl, 3 KCl, 2 MgCl<sub>2</sub>, 26 NaHCO<sub>3</sub>, 2 CaCl<sub>2</sub>, 1.25 NaH<sub>2</sub>PO<sub>4</sub>, 10  
84 dextrose, and 3 HEPES) at 34°C for 30 min then held at room temperature in normal ACSF until  
85 recording.

### 86 *Whole cell patch-clamp electrophysiology*

87 Slices were placed in a recording chamber and continuously perfused with oxygenated, warmed  
88 normal ACSF (1–2 mL/min, 28-30°C) containing synaptic blockers (3 μM strychnine, 20 μM SR95531  
89 (gabazine), 15 μM DXQX, and 20 μM AP5; Sigma) to isolate intrinsic activity. Whole cell patch-clamp  
90 recordings were performed on visually identified NA cells using infrared differential interference  
91 contrast video microscopy. Initial glass recording pipette resistances were 3–7 MΩ. Pipettes were filled  
92 with a potassium gluconate intracellular recording solution (in mM: 110 potassium gluconate, 20 KCl, 1  
93 EGTA, 2 MgCl<sub>2</sub>, 10 HEPES, 2 Na<sub>2</sub>ATP, 0.3 Na<sub>2</sub>GTP, 10 phosphocreatine and 0.2% biocytin). Series  
94 resistance, cell capacitance, and resting membrane voltage were measured upon break-in in voltage  
95 clamp mode. Voltage recordings were made with a MultiClamp 700B amplifier (Molecular Devices,

96 Sunnyvale, CA) set to current-clamp mode. Application of the current stimulus and recording of the  
97 voltage output were controlled by an analog-to-digital board (National Instruments, Austin, TX) and a  
98 computer running custom software written in IGOR Pro (WaveMetrics, Lake Oswego, OR). A holding  
99 current was applied to maintain a constant voltage baseline of approximately -60 mV. Drug application  
100 for pharmacological manipulation of voltage response was performed by bath application (100 nM  $\alpha$ -  
101 dendrotoxin, Tocris-Cookson).

102 Cell type classification protocols were carried out to identify neuronal phenotypes in NA with  
103 400-ms-duration flat current steps of varying amplitudes from -150 pA up to 750 pA in 50 or 100 pA  
104 intervals. We collected data from 77 NA neurons (20 single-spike, 12 tonic I, 16 tonic II, 23 tonic III, and 6  
105 damped). The patterns of action potential (AP) firing over multiple current steps were used to divide NA  
106 neurons into 3 broad groups: single-spiking, tonic firing or damped. Single spiking NA neurons  
107 resembled neurons in NM and NL, firing a single onset AP at all step amplitudes. Tonic firing neurons  
108 fired repetitively with overshooting action potentials throughout the duration of the flat current steps at  
109 most amplitudes, but could be further subdivided based on their characteristic firing at depolarizing  
110 steps just above rheobase: burst firing at the onset of current injection (tonic I), a delay followed by  
111 burst firing (tonic II), or tonic firing with uniform interspike intervals (tonic III) (see (25) for more details).  
112 Damped neurons fired broad APs that progressively declined in amplitude into oscillatory subthreshold  
113 potentials. If the neuron type was ambiguous from the current levels utilized, subsequent, smaller  
114 intervals were used to distinguish the phenotype. Passive membrane properties were assessed using a  
115 small hyperpolarizing current step (-50 pA).

116 *Acquisition of f-I curve and analysis.*

117 Input-output functions were assessed by measuring firing-current (f-I) curves with standard flat  
118 current steps (400 ms duration as for classification protocols) or noisy current stimuli (2 second



119 duration). Stimuli to acquire noise  $f$ -I curves were constructed by convolving Gaussian white noise with  
120 an exponential function (time constant, 3 ms) added to a DC step function as described previously (26,  
121 27). These noise stimuli simulate the arrival of many small, stochastic, and statistically independent  
122 synaptic currents, both excitatory and inhibitory. To accommodate cell-to-cell differences in input  
123 resistance, a standard noise current was created by calibrating the standard deviation (around a zero  
124 mean) of the noise current to generate a 2-mV standard deviation in the membrane potential in the  
125 target neuron, designated “ $1\sigma$ ”. The amount of voltage fluctuation was varied by multiplying the  
126 standard noise stimulus by a factor of 2, 4, or 8 (i.e. 4-, 8- and 16-mV voltage fluctuation, respectively).  
127 Each trial had an interstimulus interval of 8-10 seconds. A hyperpolarizing conditioning pre-pulse (-50  
128 pA, 1 sec) was applied prior to each stimulus to minimize sodium channel inactivation from the prior  
129 stimulus. A complete series of stimuli in the parameter space [mean DC, noise level] was systematically  
130 generated by varying the mean current amplitude and noise level independently (3 noise levels, 5-7 DC  
131 levels). Firing rates were averaged across 3 stimulus repetitions over the full 2-second duration and  
132 reported as mean  $\pm$  SD in Hertz. After acquisition of control data, DTX (100 nM) was bath-applied to the  
133 slice and data for drug trials acquired after a 10 minute wash in period.

134 Metrics to quantify differences between the lowest noise level ( $2\sigma$ ) and highest noise level ( $8\sigma$ )  
135 curves were devised. One metric quantified the total area difference index (ADI)(28):

136

$$ADI = \frac{\sum_{i=1}^n \text{normFR}_{8\sigma,i} - \sum_{i=1}^n \text{normFR}_{2\sigma,i}}{\sum_{i=1}^n \text{normFR}_{8\sigma,i}}$$

137

138 where normFR was the normalized firing rate at each of  $n$  steps in each noise level. The second  
139 metric was the normalized difference in the maximum firing rate between  $2\sigma$  and  $8\sigma$ ,  $\Delta\text{MaxFR}$ :

140 
$$\Delta MaxFR = \frac{MaxFR_{8\sigma} - MaxFR_{2\sigma}}{MaxFR_{8\sigma}}$$

141 where MaxFR refers to the maximum firing rate value of each  $f$ -I curve. Both metrics varied from  
142 0 (curves are identical) to 1 (maximum difference). Plotting these points (MaxFR index and the ADI  
143 index) against each other produced a spectrum of fluctuation sensitivity. Neurons closest to the origin  
144 were more “integrator-like”, while neurons further away from the origin were more “differentiator-  
145 like”. Using the criteria of ADI and  $\Delta MaxFR > 0.2$ , we were able to test the noise  $f$ -I curves from 15  
146 differentiators and 5 integrators with DTX.  $\Delta MaxFR$  index and ADI index were statistically compared  
147 using Wilcoxon’s t-test.

#### 148 *Spike timing reliability*

149 After noise was calibrated, a  $4\sigma$  noisy current was injected into neurons at a single DC current  
150 step amplitude (typically 150-400 pA) to produce a firing rate between 20-50 Hz. Repeated trials of 2  
151 second long frozen noisy current injections were injected (usually 30 to 45 trials, or until >600 spikes  
152 were collected) before and after DTX application. To quantify neuronal reliability, we calculated a  
153 shuffled autocorrelogram (SAC), a histogram of all interspike intervals between spikes across trials,  
154 excluding intervals within the same trial. The SAC is normalized by the normalizing factor (NF):

155 
$$NF = N \cdot (N - 1) \cdot r^2 \Delta\tau D$$

156 where  $N$  is the number of trials,  $r$  is the average firing rate,  $\Delta\tau$  is the bin width of the correlation  
157 function (0.2 ms) and  $D$  is the length of the stimulus (2 sec) (26, 27, 35, 36). The SAC was fit with a  
158 Gaussian function, whose central peak is defined as the correlation index (CI). The precision of the firing  
159 between trials is represented in the full-width at half-maximum (FWHM) of the Gaussian curve,  
160 measured by

161 
$$FWHM = 2\sqrt{2\ln 2} \cdot \sigma_{SAC}$$

162 where  $\sigma_{SAC}$  represents 1 standard deviation of the gaussian fit of the SAC. Spike threshold was  
163 determined using the first derivative of the voltage signal and applied uniformly for all trials. CI and  
164 FWHM, referred to as width, were quantified and compared using Wilcoxon's t-test.

165 *Mutual information*

166 To quantify the mutual information (I) between spike trains under control conditions (X) versus  
167 those recorded in DTX (Y), spike times were binned (1 ms) and their time bin distributions ( $x_i, y_i$ ) were  
168 used to calculate Shannon's equation for mutual information (37, 38) :

169 
$$I(X; Y) = H(X) - H(X|Y)$$

170 where H(X) is the marginal entropy, or the observable information of X:

171 
$$H(X) = -\sum_{i=1}^n p(x_i) \log_2 p(x_i).$$

172 where  $p(x_i)$  is the probability of distribution  $x_i$  and the entropy is given in bits.  $H(X|Y)$ , the  
173 conditional entropy, is the reduction of uncertainty about X given Y:

174 
$$H(X|Y) = \sum_{i,j}^n p(x_i, y_j) \log_2 \frac{p(x_i, y_j)}{p(y_j)}$$

175 
$$MI = 1 - H(X|Y)$$

176 Where  $p(x_i, y_i)$  is the probability that  $X = x_i$  and  $Y = y_i$ . To control for random changes or response  
177 drift over the recording time, the experimental mutual information was compared to the mutual  
178 entropy calculated between control and "sham" conditions, where ACSF without DTX was washed into  
179 the recording chamber. Mutual information is reported in bits but bounded by zero and 1, and then

180 subtracted from 1 which allows for zero to mean X and Y are completely independent and 1 to mean X is  
181 entirely predicted by Y, analogous to a similarity measure.

182

### 183 *Action Potential Threshold Analysis*

184 The action potential threshold was defined as the voltage at which an all-or-none regenerative  
185 spike was initiated. This threshold was determined by using the first derivative of the voltage as  
186 previously described (19). A criterion value of the derivative was selected and applied for the entire set  
187 of voltage responses across the  $f-I$  curve. Neither small changes in the criterion value nor the alternative  
188 of using the second derivative affected the results of within-subject analyses. Direct comparisons of  
189 absolute threshold between neurons, however, were omitted, as differences in the criterion applied  
190 could affect across-subject comparisons. The mean, median, and variance of the spike threshold  
191 measured across the action potentials for a given stimulus were calculated for each DC step amplitude  
192  $m$  and noise level  $s$  combination. The mean and median were nearly identical in all cases, as expected  
193 for nearly normal distributions.

194

195

196

## 197 **Results**

198 *Spiking patterns in NA are shaped by a DTX-sensitive potassium conductance.*

199           To determine whether low threshold potassium channel activation was involved in shaping the  
200 electrophysiological phenotypes observed in the chick cochlear nucleus NA, we recorded the voltage  
201 responses before and after bath application of DTX (100 nM), a specific antagonist of the Kv1.1 and  
202 Kv1.2 channels. We characterized the firing patterns and passive membrane properties using a series of  
203 flat depolarizing current injections during whole-cell patch-clamp recordings from NA neurons. As  
204 shown previously, in control conditions NA neurons displayed heterogeneous spiking phenotypes in  
205 vitro that could be broadly classified as single spiking (Fig. 1Ai) or tonic firing (Fig. 1Bi-Di)(25–27) Using  
206 small current steps, tonic firing neurons can be further distinguished into 3 subgroups based on whether  
207 they tend to show early bursts (tonic I, Fig. 1Bi), late bursts (tonic II, Fig. 1Ci), or repetitive firing evenly  
208 spaced for the duration of the stimulus (tonic III, Fig. 1Di)(see also 25 ).

209           When DTX was applied, changes in the firing patterns were observed in single spiking, tonic I  
210 and tonic II neurons. In all single spiking neurons, which characteristically fire single onset spikes upon  
211 depolarization in control conditions, DTX application induced repetitive firing throughout the current  
212 injection (n = 12; Fig 1Aii), in agreement with a previous study (22). In tonic I neurons DTX application  
213 eliminated the burst cessation in these neurons that occurred at low-amplitude steps in control and  
214 instead induced firing throughout the step duration at all step levels, (n = 9, Fig 1Bii). Similarly, in tonic II  
215 neurons DTX application eliminated the delay in firing at low-amplitude steps in control (n = 8, Fig. 1Cii).  
216 Tonic 3 neurons, in contrast, showed no apparent changes in firing pattern (n = 13, Fig. 1Dii).

217           Changes in the firing patterns also resulted in significant changes in the overall input-output  
218 functions for tonic I and tonic II neurons, as well as single spiking neurons (single spiking: n = 12, p = 0.04

219 at step amplitude 0.05 nA,  $P < 0.001$  at 0.15-0.35 nA, Fig. 1Aiii; tonic 1:  $n = 9$ ,  $P < 0.001$  at 0.15-0.35nA,  
220 Fig. 1Biii; tonic 2:,  $n = 8$ ,  $P < 0.001$  at 0.15-0.35nA, Fig1Ciii; Sidak's multiple comparisons test). These  
221 firing rate changes were accompanied by a reduction in the threshold current amplitude (rheobase) (Fig.  
222 1Aiv-Civ single spiking control mean =  $0.29 \pm 0.09$  nA, DTX mean =  $0.13 \pm 0.08$  nA,  $P=0.001$ , tonic I  
223 control mean =  $0.21 \pm 0.07$  nA, DTX mean =  $0.78 \pm 0.4$  nA,  $P=0.03$ , tonic II control mean =  $0.26 \pm 0.07$  nA,  
224 DTX mean =  $0.14 \pm 0.8$  nA,  $P = 0.03$ , Wilcoxon's test). These changes in excitability were likely partly due  
225 to the increase in input resistance measured in these neurons (single-spike:  $n = 12$ , control  $R_{in} = 101.6 \pm$   
226  $17.14$  M $\Omega$  (mean  $\pm$  SD), DTX  $R_{in} = 191.7 \pm 31.37$  M $\Omega$ ,  $P = 0.001$ , Fig. 1Av; tonic I:  $n = 9$ , control  $R_{in} =$   
227  $243.7 \pm 29.69$  M $\Omega$ , DTX  $R_{in} = 277.8 \pm 36.93$ ,  $P = 0.039$ , Fig. 1Bv; tonic II:  $n = 8$ , control  $R_{in} = 230.6 \pm 29.72$   
228 M $\Omega$ , DTX  $R_{in} = 265.5 \pm 38.1$ M $\Omega$ ,  $P = 0.042$ , Fig. 1Cv). In contrast, tonic III neurons showed no effects of  
229 DTX application on their firing rate, input output function or rheobase (Fig. 1Di-iv tonic III control mean  
230 rheobase =  $0.11 \pm 0.06$  nA, DTX mean rheobase=  $0.10 \pm 0.08$  nA,  $P > 0.99$ ) nor in their input resistance ( $n$   
231 = 13, Fig. 1Dv, control  $R_{in} = 289.7 \pm 26.2$  M $\Omega$ , DTX  $R_{in} = 291.0 \pm 24.9$  M $\Omega$ ,  $P = 0.47$ , Fig. 1Div). Finally, a  
232 separate subset of NA neurons were characterized in control conditions as having a 'damping'  
233 phenotype: broader action potentials that diminished in amplitude and whose voltage oscillates around  
234 a membrane voltage. In these neurons, DTX application had no apparent effect on the voltage response  
235 (Fig. 2A). Neither the damping constant (Fig. 2B) nor the input resistance (Fig. 2C) were altered.  
236 Together, these results indicate that a DTX-sensitive conductance, the putative  $G_{LKT}$  conductance,  
237 contributes to the spiking patterns and firing rates of a specific subset of NA neurons.

238 *The DTX-sensitive conductance improves temporal firing reliability and information content in tonic firing*  
239 *neurons*

240 Different subtypes of NA neurons exhibited varying levels of temporal reliability in response to  
241 frozen noise stimulation in vitro (26). To test whether  $G_{LKT}$  regulated temporal reliability in NA, we

242 collected voltage responses to repeated trials of frozen noise from 49 NA neurons before and after DTX  
243 application (9 tonic I, 8 tonic II, 16 tonic III, 5 damped, 11 single-spike) (Fig. 3A, C). The trial-to-trial  
244 temporal firing reliability was analyzed using a shuffled autocorrelogram (SAC), a histogram of all across-  
245 trial interspike intervals excluding within-trial spike pairs (Fig. 3B) (26, 35). The peak (correlation index,  
246 CI) and width of the SAC indicate the degree and precision of the time locking of the spikes across trials.  
247 Application of DTX significantly reduced the SAC peak amplitudes measured in single spiking, tonic I and  
248 tonic II neurons (single spiking: control CI =  $47.4 \pm 12.6$ , DTX CI =  $22.4 \pm 12.3$ ,  $n = 11$ ,  $P = 0.005$ ; tonic I:  
249 control CI =  $28.9 \pm 6.7$ , DTX CI =  $11.1 \pm 5.4$ ,  $n = 9$ ,  $P = 0.0059$ ; tonic II: control CI =  $13.7 \pm 4.6$ , DTX CI =  $7.0$   
250  $\pm 2.4$ ,  $n = 8$ ,  $P = 0.042$ )(Fig. 3B, C; summary data in Fig. 4A, B) and increased the SAC width (single  
251 spiking: control FWHM =  $0.5 \pm 0.34$  ms, DTX FWHM =  $1.2 \pm 1.0$  ms,  $P < 0.001$ ; tonic I: control FWHM =  
252  $2.02 \pm 0.93$  ms, DTX FWHM =  $3.11 \pm 1.22$  ms,  $P < 0.001$ ; tonic II: control FWHM =  $1.97 \pm 0.32$  ms, DTX  
253 FWHM =  $3.41 \pm 0.71$  ms,  $P = 0.039$ , Fig. 4C). In contrast, in tonic III or damped neurons, DTX application  
254 had no significant effect on the SAC peak (tonic III: CI =  $4.83 \pm 3.82$ , DTX CI =  $4.68 \pm 3.98$ ,  $n = 12$ ,  $P = 0.84$ ;  
255 damped: control CI =  $3.59 \pm 1.04$ , DTX CI =  $4.96 \pm 2.88$ ,  $n = 9$ ,  $P = 0.84$ ) or width (tonic III: FWHM =  $3.85 \pm$   
256  $1.64$  ms, DTX FWHM =  $4.32 \pm 2.13$  ms,  $P = 0.41$ ; damped: control FWHM =  $6.43 \pm 3.14$  ms, DTX FWHM =  
257  $6.01 \pm 3.55$  ms,  $P = 0.56$ ). These results indicate that  $G_{\text{KLT}}$  contributes to precise and reliable firing in the  
258 same subset of cell types that showed firing rate changes with DTX (single spiking, tonic I and II) but not  
259 in the tonic III or damped neurons.

260 Another method to quantify the similarity (or dissimilarity) of the spiking responses before and  
261 after DTX application is to measure the mutual information (MI) contained in the two sets of spike trains  
262 (see Methods )(37, 38). MI quantifies the predictive value of one data set toward the other in bits,  
263 where 1 indicates complete certainty and zero indicates complete independence between the data sets.  
264 The MI between control and DTX trials was low in single-spike, tonic I, and tonic II neurons (Fig. 5, red  
265 markers and bars), indicating a high degree of dissimilarity. The same analysis applied to separate

266 experiments that used sham drug application yielded an MI close to 1, significantly higher than for DTX  
267 experiments ( $P < 0.001$ ,  $P = 0.007$ ,  $P = 0.028$  respectively, Wilcoxon's test). For tonic III neurons, the  
268 mutual information between control and DTX spike trains was somewhat higher than for other neurons  
269 but was similar to that during sham experiments, suggesting DTX had no specific effect on these neurons  
270 ( $P = 0.708$ ) (Fig. 5). Together, these spike train timing analyses suggest that Kv1 channels are crucial for  
271 the specific and reliable encoding of dynamic stimuli in a subset of NA neurons.

272 *Kv1 channel expression drives fluctuation sensitivity by contributing to an adaptive spike threshold.*

273 A key feature of coincidence detector neurons is their selective responsivity to highly correlated  
274 synaptic inputs that cause a rapid rise in the postsynaptic voltage. To determine whether DTX affected  
275 the selectivity of NA neurons to rapid changes in their inputs, we measured the spike-triggered average  
276 current (STA) of the stimulus preceding each action potential. The peak-to-trough amplitude of the STAs  
277 were reduced by application of DTX in the single spike, tonic I, and tonic II neurons (single spiking  
278 control amplitude =  $0.11 \pm 0.02$  nA, DTX amplitude =  $0.044 \pm 0.01$  nA,  $n = 11$ ,  $P < 0.001$ , Wilcoxon t-test;  
279 tonic I control amplitude =  $0.032 \pm 0.005$  nA, DTX amplitude =  $0.019 \pm 0.001$  nA,  $n = 9$ ,  $P = 0.036$ ; tonic II  
280 control amplitude =  $0.031 \pm 0.02$  nA, DTX amplitude =  $0.0185 \pm 0.0015$  nA,  $n = 8$ ,  $P = 0.014$ ) (Fig 6). In  
281 contrast, the peak-trough amplitudes of the STAs for the tonic III and damped neurons were unaltered  
282 (tonic III amplitude =  $0.015 \pm 0.0013$  nA, DTX amplitude =  $0.016 \pm 0.003$  nA,  $n = 16$ ,  $P = 0.73$  ; damped  
283 control amplitude =  $0.013 \pm 0.003$  nA, DTX amplitude =  $0.013 \pm 0.003$  nA,  $n = 5$ ,  $P = 0.95$ ). A large STA  
284 amplitude indicates that the neuron will only fire to rapidly rising inputs, so a reduction in STA amplitude  
285 implies a corresponding reduction in selectivity.

286 Previous studies of the input-output function of the repetitively firing neurons in NA showed  
287 that sensitivity to rapidly rising inputs leads higher firing rates to stimuli containing larger fluctuations  
288 (19, 26, 28). Neurons that showed the greatest fluctuation sensitivity have been dubbed



289 'differentiators', in contrast to 'integrator' neurons whose firing rates reflected the mean stimulus level  
290 regardless of the size of the noise fluctuations around the mean (39). To determine whether  $G_{KLT}$   
291 affected fluctuation sensitivity, we measured the  $f$ -I curves using current steps with two noise  
292 fluctuation amplitudes ( $2\sigma$ ,  $4\sigma$  and  $8\sigma$ ) before and after DTX application. In 15 tonic firing NA neurons  
293 classified as differentiators (one control example shown in Fig. 7Ai), DTX application elevated firing rates  
294 overall (the maximum measured firing rate increased from a mean across 15 neurons of 68.4 Hz in  
295 control to 83.7 Hz with DTX, data not shown). However, it also reduced the relative firing rate  
296 enhancement to larger current noise fluctuations compared to smaller noise fluctuations (Fig. 7Aii).  
297 These noise  $f$ -I curves were quantified by measuring the normalized difference in maximum firing rate  
298 (MaxFR Index) between the low noise ( $2\sigma$ ) and high noise ( $8\sigma$ ) and the normalized firing rate difference  
299 over the entire curve (Area Difference Index, ADI) (see Methods). Both these measures are larger in  
300 differentiators than in integrators (which are close to the origin, Fig. 8Ai) and decreased significantly  
301 with DTX (Fig. 7Bi-Biii MaxFR Index control =  $0.388 \pm 0.152$ , Differentiator DTX =  $0.199 \pm 0.146$ ,  $n = 15$ ,  $P$   
302  $< 0.001$ , Student's t-test; ADI control =  $0.455 \pm 0.175$ , DTX =  $0.273 \pm 0.158$ ,  $P < 0.001$ ). In contrast,  
303 application of DTX had little effect on the noise  $f$ -I curves in 5 tonic firing NA neurons classified as  
304 integrators (Fig. 8A, MaxFR Index control =  $0.035 \pm 0.034$ , DTX =  $0.029 \pm 0.0581$ ,  $n = 5$ ,  $P = 0.42$ ,  
305 Student's t-test; ADI control =  $0.052 \pm 0.072$ , DTX =  $0.043 \pm 0.083$ ,  $P = 0.39$ ). It should be noted that this  
306 reduction cannot be explained by a simple proportional increase in all firing rates, which would have had  
307 no effect on the normalized indices. Thus blocking  $G_{KLT}$  with DTX selectively reduced the fluctuation  
308 sensitivity by the differentiator neurons, causing them to behave more like an integrator neuron.

309 The primary mechanism underlying the fluctuation sensitivity and high pass behavior has been  
310 proposed to be an adaptive spike threshold (31, 40, 41). Sodium channel inactivation is a key ion  
311 channel mechanism to achieve the adaptation (31), but other conductances that are active in the  
312 subthreshold regime have the potential to influence threshold (32, 34, 39, 42). During adaptation, the

313 voltage threshold dynamically varies depending on the mean voltage, the rate of rise in the voltage, and  
314 the time since a preceding action potential . We asked whether the effects described above are  
315 consistent with a role for  $G_{KLT}$  in spike threshold adaptation. To measure spike threshold adaptation, we  
316 measured threshold variation during noisy current drive, as previously described in NA neurons (28).  
317 With DTX application, the variation in the threshold to the large noise stimulus ( $8\sigma$ ) was reduced (Fig9A),  
318 and the spike waveforms were more stereotyped (Fig9B, C). Across 15 NA tonic firing neurons, DTX  
319 significantly reduced the threshold variation across a range of mean current amplitudes (2-way ANOVA,  
320 main effect by drug, [F(20, 345)= 10.95, P =0.001]; P = 0.003 at 0.20 nA, P=0.0021 at 0.25 nA, P<0.001 at  
321 0.30 and 0.35 nA, Sidak's multiple comparisons test)(Fig. 9D). These data show that consistent with the  
322 reduction in filtering, DTX affects fluctuation sensitivity at least in part due to reduced threshold  
323 adaptation. These results suggest that Kv1 channels are involved in threshold adaptation at higher noise  
324 levels, possibly in conjunction with sodium channel inactivation.

325

## 326 Discussion

327 The role of the low-threshold gated potassium conductance ( $G_{KLT}$ ) in the temporal processing of  
328 auditory signals has been extensively studied. The  $G_{KLT}$  conductance is attributed to the expression of  
329 members of the Kv1 family of voltage gated potassium channels, particularly Kv1.1 and Kv1.2, that are  
330 prevalent throughout the auditory brainstem structures of birds and mammals (14, 15, 22, 43). Distinct  
331 from the Kv3 family associated with a high threshold conductance responsible for action potential  
332 repolarization (44–46), in vitro studies showed that  $G_{KLT}$  activates at membrane potentials near rest  
333 and is responsible for the single spiking behavior and outward rectification characteristic of many  
334 auditory neurons (5, 6, 47–49), Activation of  $G_{KLT}$  results in a short membrane time constant that  
335 prevents the temporal summation of synaptic potentials (9, 50, 51). Thus the  $G_{KLT}$  conductance is a key

336 component to phase locking to the fine temporal structure in the acoustic signal and high fidelity  
337 sensory encoding in the cochlear nucleus NM (3, 23, 52). In the avian interaural time difference (ITD)  
338 circuit, dynamic activation of this conductance is crucial for the spike initiation properties that underlie  
339 the coincidence detection in the NL (5, 6, 8, 22, 32, 39, 53–56). Similar effects can be observed in the  
340 analogous mammalian circuit (42, 57–61).

341         Pharmacological and immunohistochemical studies, however, have suggested that Kv1 channels  
342 are not exclusively expressed in these timing pathways but are also present in the sister cochlear  
343 nucleus, NA (10, 22, 30). In this study, we found that pharmacological blockade of  $G_{KLT}$ , with the  
344 Kv1.1/1.2 specific antagonist DTX, dramatically altered the firing phenotypes of some NA neuronal  
345 subtypes but not others. Specifically, the single-spiking neurons and the tonic I and tonic II phenotypes  
346 lost their unique onset or bursting firing patterns, while the tonic III phenotype that only displayed  
347 regular spiking was unchanged. Additionally, we found that the temporal reliability of firing, high-pass  
348 filtering characteristics, and spike threshold adaptation were all partially reliant on the DTX-sensitive  
349 conductance. These results suggest that Kv1 channels make important contributions to the intrinsic  
350 physiological diversity and functional heterogeneity of NA neurons.

351 *Ionic basis of electrophysiological diversity in NA.*

352         Previous work showed that DTX application to single spiking NA neurons converted them into  
353 repetitive firing neurons (22). More surprising was the finding that DTX also caused an increase in firing  
354 rate in NA tonic firing neurons. We confirmed and extended these results to show that DTX-sensitive  
355 changes in firing pattern and rate are related to the physiological classifications in the chick embryonic  
356 brain stem described previously (25). The DTX effects were limited to tonic firing neurons that show  
357 bursting behavior at lower current stimulus levels. We conclude that the burst termination (tonic I) and  
358 delayed burst (tonic II) behaviors both require the presence of a DTX-sensitive conductance, but it

359 remains unclear what causes the differences in their response patterns. One explanation could be a  
360 difference in the activation or inactivation kinetics of the Kv1 channel conductance; a slow inactivation  
361 of  $I_{KLT}$  has been shown in NM neurons (62). Since two isoforms, Kv1.1 and Kv1.2, are both DTX-sensitive,  
362 there may be differences in subunit compositions or modulation. Alternatively, there may be some  
363 other subthreshold conductance present in one type of tonic neuron that interacts with the DTX-  
364 sensitive current (e.g., an A-type current that could enhance early bursting (33, 34). Two neuron types in  
365 NA appeared unaffected by DTX: tonic III neurons which best represent canonical rate-coding  
366 integrators, and damped neurons, a potential immature phenotype (22, 29). In the presence of DTX, the  
367 blockade of bursting resulted in responses by all three tonic firing subtypes more closely resembling  
368 each other. Because these subtype differences have not been observed in the hatchling (22), it is  
369 possible that the increase in excitability and reduction in phenotypic diversity that occurs with  
370 development could be due to a downregulation of  $G_{KLT}$ . Examining these neuronal subtypes is important  
371 because computational approaches have shown that increased population heterogeneity is directly  
372 correlated with increased information encoding capacity (27).

373

374 *Neurons in the NA utilize Kv1 channels to encode the temporal dynamics of their inputs.*

375 Multiple features demonstrated as archetypal in NA appear to be at odds with a presumed role  
376 for  $G_{KLT}$  in temporal processing: multi-spiking intrinsic firing properties (1, 22, 26), poorer phase-locking  
377 in vivo to the acoustic fine structure, and a role in interaural level coding (3, 16, 23). However, a more  
378 complex picture of sound processing in NA has been emerging. First, the heterogeneity of in vivo  
379 response properties and morphology suggested that NA is not a monolithic rate-coding nucleus, but a  
380 diverse population of neurons (21, 25), some of which show temporal sensitivity, dynamic feature  
381 selectivity, and auditory envelope processing (19, 20, 26, 28). Second, in vitro studies showed a diversity

382 of intrinsic features across the population, some of which also demonstrated greater temporal  
383 sensitivity than others (25–27). In another study, the differentiator-type intrinsic properties of a subset  
384 of NA neurons could account for the intensity-dependent bandpass behavior in vivo (19). In their model,  
385 the high-pass filtering due to active intrinsic membrane properties of the tonic-firing, coincidence-  
386 detector-like neurons combined with the low-pass filter behavior of the synaptic inputs and passive  
387 membrane properties resulted in the overall bandpass filtering. Interestingly, variation in the properties  
388 across the neuronal population produced an array of bandpass properties spanning the physiological  
389 response space. The results presented in the present study provides direct evidence that variations in  
390 Kv1 conductances contribute to the variations in temporal processing properties in vitro; it remains to  
391 be tested whether a mature circuit in vivo would also require these properties to encode  
392 spectrotemporal auditory information. Neurons with high reliability should be capable of encoding more  
393 rapidly changing components of the acoustic signal, such the onsets and gaps that are key features of  
394 speech and other communication signals. Neurons with less reliability are likely to be important for  
395 encoding the more slowly changing aspects of the acoustic signal, such as slower envelope variations or  
396 ongoing interaural level cues. Together, these studies suggest that NA neurons function on a spectrum  
397 of operating modes, ranging from pure integrators to pure coincidence-detectors (34).

398 *Spike threshold adaptation in NA neurons may rely on the low threshold potassium conductance.*

399 The operating mode diversity observed across NA specifically appears to arise from a  
400 mechanism known as spike-threshold adaptation, a phenomenon by which the voltage threshold is  
401 modulated by spike history and membrane voltage mean and rate of rise (19, 63–65). This form of  
402 adaptation is the probable mechanism underlying the selective responsiveness of NA neurons to rapid  
403 rises in the postsynaptic voltage, acting like a high-pass filter and enhancing the firing response to  
404 temporally modulated inputs. Spike threshold adaptation is a process that occurs throughout the brain,

405 particularly in cortical pyramidal neurons, and auditory brainstem neurons (19, 28, 31, 32, 66, 67). In NA,  
406 threshold adaptation drives NA neurons to encode amplitude modulations with higher fidelity than  
407 auditory nerve fibers (19) as well as diversifies their operating modes (28). Phenomenological models  
408 based on sodium channel inactivation as a mechanism were successful at recapitulating the firing  
409 responses (19, 28), however these models use abstract conductance representations that do not  
410 specifically rule out other non-sodium, subthreshold conductances, such as the Kv1 channel. In a study  
411 of cortical neurons, blockade of Kv1 channels with DTX largely eliminated spike threshold adaptation  
412 (32). Our results suggest a similar role for Kv1 in NA neurons.

#### 413 *Functional analogs of NA neurons in the mammalian cochlear nucleus*

414 The mammalian auditory brain stem is not anatomically homologous to the avian auditory brain  
415 stem. The mammalian ventral cochlear nucleus (VCN) has functionally similar cell types to those in NA,  
416 but there does not appear to be a one-to-one match for each type. For example, the spherical bushy  
417 cells of the VCN are analogous to the avian NM neurons in that both have high levels of Kv1 expression,  
418 receive calyceal inputs from auditory nerve fibers, generate precise spiking phase-locked to the fine  
419 structure in auditory signals and project to analogous coincidence detection circuits (68). The T-stellate  
420 cells of the VCN appear to be the closest functional analog to NA neurons, in that they have reduced  
421 phase-locking relative to auditory nerve inputs, repetitive intrinsic firing properties, encode envelope  
422 and intensity information for spectrotemporal coding, and project directly to the midbrain inferior  
423 colliculus (1, 12, 69–74). Identified T-stellate neurons lack any significant low threshold potassium  
424 channel conductance and are insensitive to DTX (75–78). These results suggest that the T-stellate  
425 neurons of the VCN are not functionally analogous to the DTX-sensitive neurons in NA (tonic I/tonic II  
426 subtypes), but instead may be more similar to the DTX-insensitive, integrator like neurons of NA (tonic III  
427 subtype). Another study, using acutely dissociated neurons and voltage clamp, suggested there was a

428 population of neurons in the VCN with intermediate levels of DTX-sensitive, lower-threshold  
429 conductances, possibly corresponding to the radiate (or D-stellate) type of multipolar neurons, a less  
430 common type of repetitively firing neuron in the AVCN that projects to the dorsal cochlear nucleus (72,  
431 79–81). The recent discovery in the VCN of a third stellate neuron population, dubbed L-stellate, which  
432 appears to provide narrowband inhibition and operates within a feedback loop with T-stellate neurons  
433 (82) further suggests there may be greater phenotypical diversity than previously appreciated. How  
434 these cell types may correspond to NA cell types remains to be seen. These multi-spiking neurons in VCN  
435 can entrain to high frequency stimuli in vitro, but the reliability of responses to the noisy, temporally  
436 modulated stimuli we describe in the present study have only been tested in DCN neurons (36).  
437 Comparisons between NA and VCN are complicated by the fact that VCN contains a dense network of  
438 lateral connectivity and local inhibition, while NA appears to be a strictly feedforward circuit without  
439 local inhibition, so their feature selectivity and computational roles are likely to be quite dissimilar. Also  
440 limiting comparisons of intrinsic properties across studies are species differences (chick vs guinea pig vs  
441 mouse) and the possible confounding effect of temperature on the kinetics of the ion channels (78, 83).

#### 442 *Summary*

443 In summary, we have demonstrated that dendrotoxin-sensitive conductances are prevalent in a  
444 subpopulation of NA neurons and are critical for the temporal response properties in these neurons. By  
445 enhancing spike threshold adaptation, this conductance underlies the spike timing reliability, high-pass  
446 membrane filtering, and fluctuation sensitivity properties of the differentiator subtypes. The regulation  
447 of the Kv1 family of channels may be a key driver of intrinsic electrophysiological diversity in the avian  
448 cochlear nucleus and contribute to spectrotemporal auditory feature selectivity in vivo.

449 1686 words

450

451

452 **Acknowledgements**

453 Support for this research was provided by NIH grant R01DC10000. The authors thank Felix Bartsch for

454 his helpful advice and MATLAB code for the mutual information analysis.

455

456



457 **Figures**

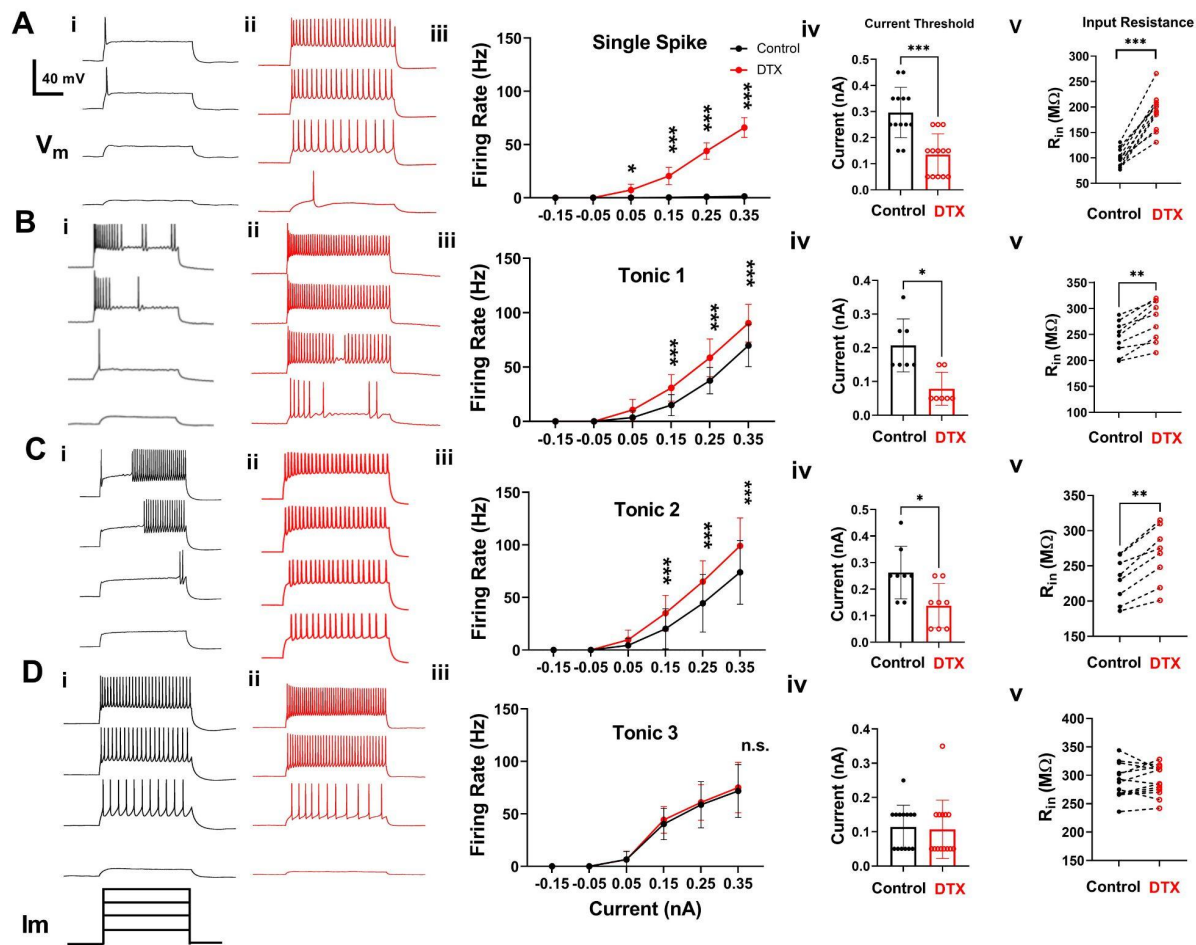

458

459 **Fig. 1. Dendrotoxin altered the spiking responses in a subset of NA neurons.** Voltage  
460 responses were elicited by a set of current injections of increasing amplitude into NA neurons  
461 comprising 4 major cell types: single-spiking (row A) and 3 subtypes of tonic firing neurons: tonic I (row  
462 B), tonic II (row C), and tonic III (row D). Example traces show matched responses during control  
463 conditions (Ai-Di) and following DTX application (Aii-Dii). In DTX, firing rate increased in single-spike,  
464 tonic I, and tonic II neurons (Aiii:  $P < 0.001$ ; Biii:  $P < 0.001$ , Ciii:  $P < 0.001$ , 2-way ANOVA) but not in tonic  
465 III neurons (Diii,  $P = 0.25$ ). Asterisks indicate Sidak's post hoc multiple comparisons test significance, \*  $P$   
466  $< 0.05$ , \*\*\*  $P < 0.001$ . The current amplitude threshold (rheobase) was also significantly reduced (Ai:  $P$   
467  $< 0.001$ ; Biv:  $P = 0.03$ ; Civ:  $P = 0.03$ , Wilcoxon's signed rank test) except in tonic III neurons (Div,  $P >$   
468  $0.99$ ). Input resistance increased in single-spike, tonic I, and tonic II neurons (Av:  $P = 0.001$ ; Bv:  $P =$   
469  $0.039$ , and Cv:  $P = 0.042$ , Student's t-test) except in tonic III neurons (Dv:  $P > 0.99$ ).

470

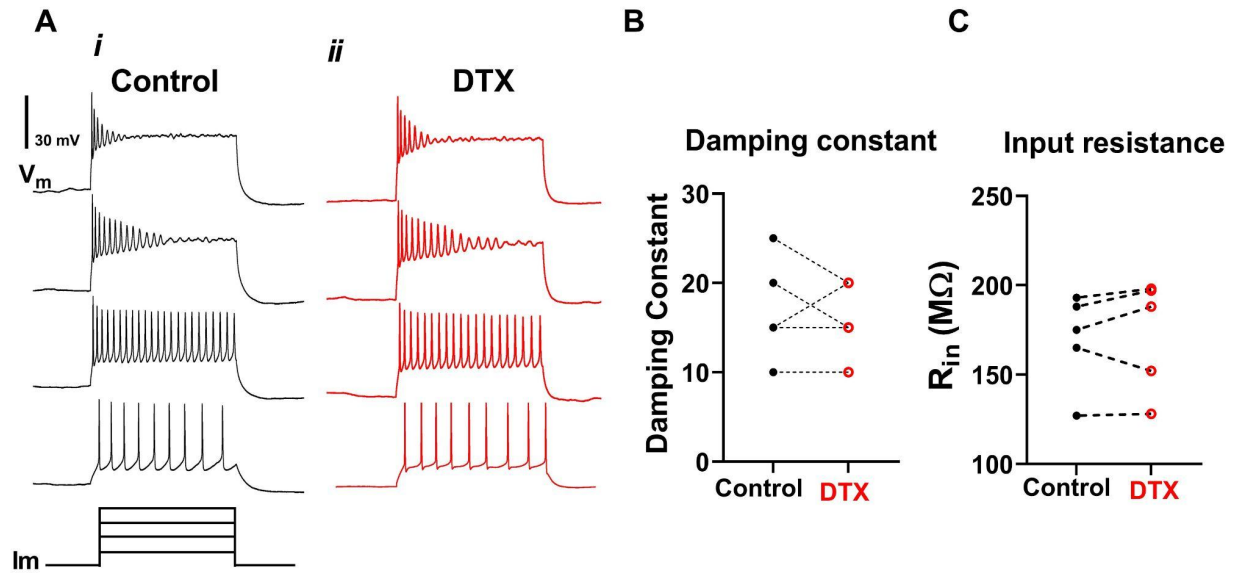

471

472 **Fig. 2. DTX did not alter firing or intrinsic properties of damped neurons.** Voltage responses in  
473 response to flat current injections (400 ms duration) showed no apparent change between control (Ai)  
474 and after DTX application (Aii). The damping constant (B) and input resistance (C) were unchanged  
475 (control damping constant =  $19.0 \pm 6.3$  (mean  $\pm$  SD), DTX damping constant =  $18.2 \pm 5.2$ ,  $P = 0.97$ ;  
476 control  $R_{in} = 168.3 \pm 22.4$   $M\Omega$ , DTX  $R_{in} = 174.8 \pm 26.7$   $M\Omega$ ,  $P > 0.99$ , Student's t test).

477

478

479

480

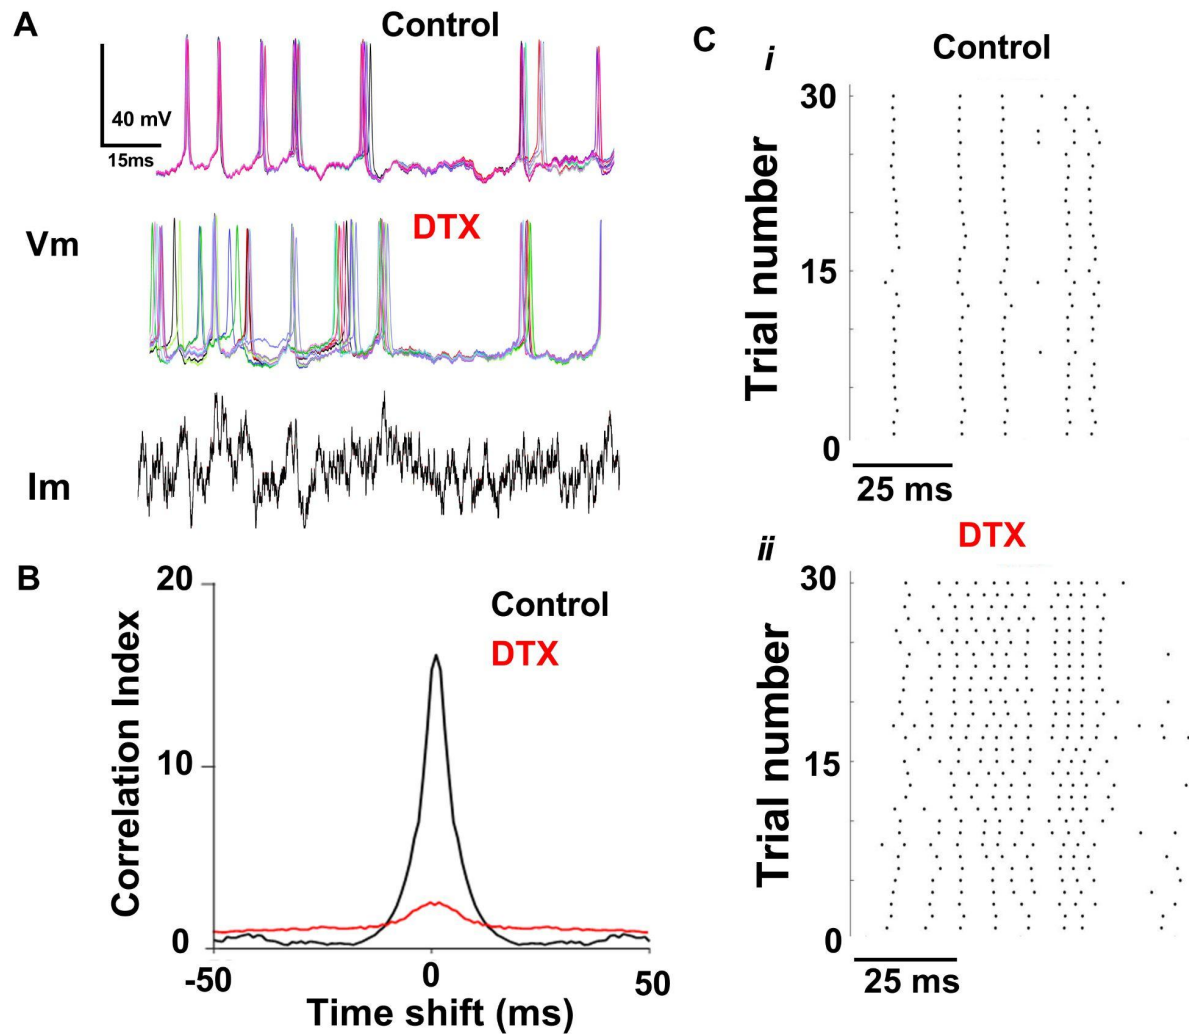

481

482 **Fig. 3. DTX reduced the spike timing reliability in a tonic II neuron in NA.** A) Overlaid voltage  
483 traces ( $V_m$ ) for seven repetitions of an identical "noisy" current ( $I_m$ ) stimulus in control and 100 nM DTX  
484 conditions. Only the first 150 ms of the 2 second long stimulus is shown. B) Raster plots of all 30 trials  
485 for each condition, first 100 ms of response (onset at 0 ms). C) Spike timing reliability quantified with a  
486 shuffled autocorrelation showed a reduced peak correlation index and broader distribution for  
487 responses in the presence of DTX.

488

489

490

491

492

493

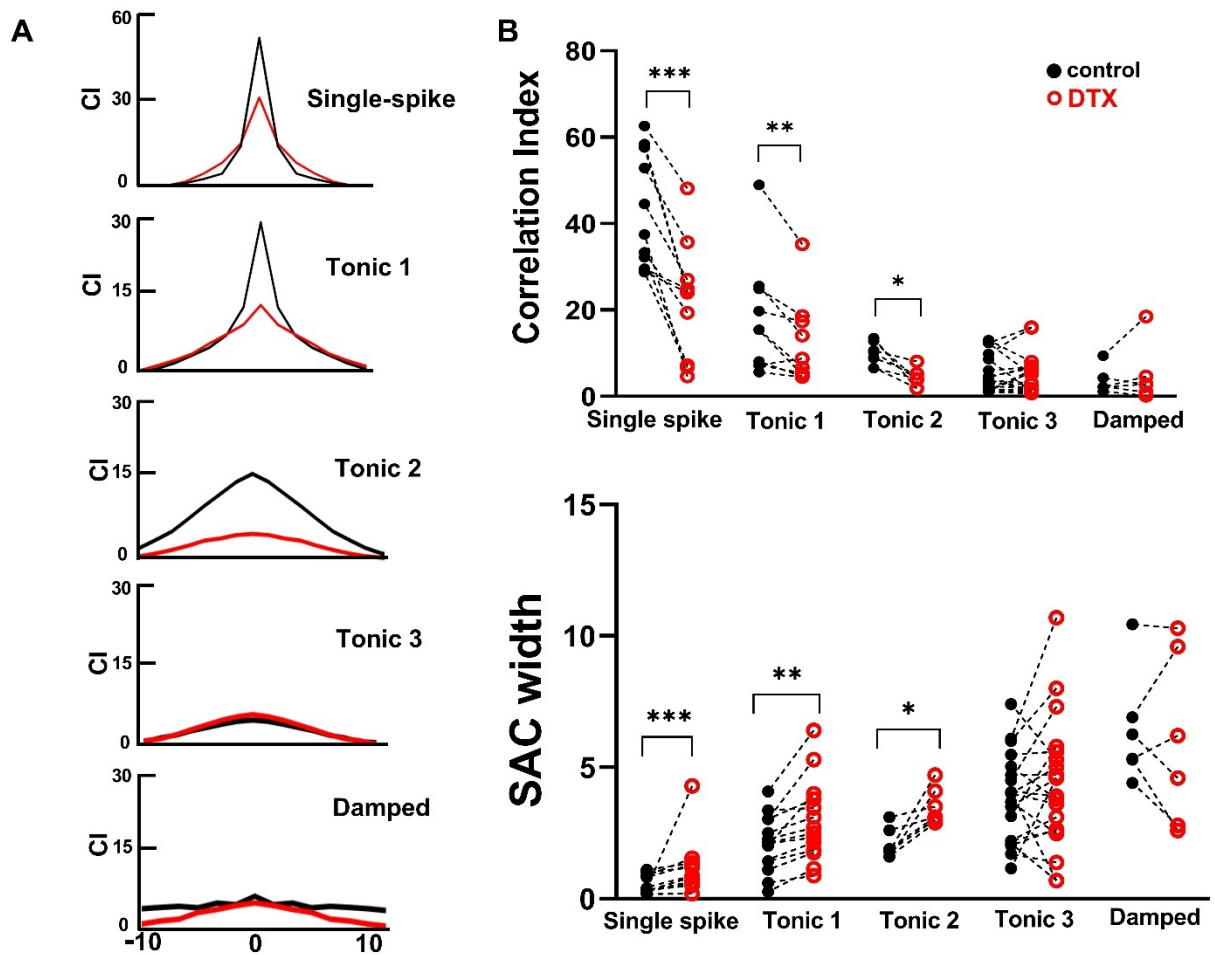

494

495

496 **Fig. 4. DTX reduced the spike timing reliability in cell type-specific manner.** (A) Averaged SAC  
497 across all neurons recorded for each of the 5 cell types (control, black, DTX, red). (B) Summary data of  
498 SAC parameters peak correlation index (CI)(top) and full width at half-maximum height (FWHM)  
499 (bottom). Peak CI decreased in single-spike, tonic I, and tonic II neurons ( $P < 0.001$ ,  $P = 0.0028$ ,  $p =$   
500  $0.0087$ , respectively, Wilcoxon's test) while corresponding FWHM values increased ( $P < 0.001$ ,  $P < 0.001$ ,  
501  $P = 0.028$  ).

502

503

504

505

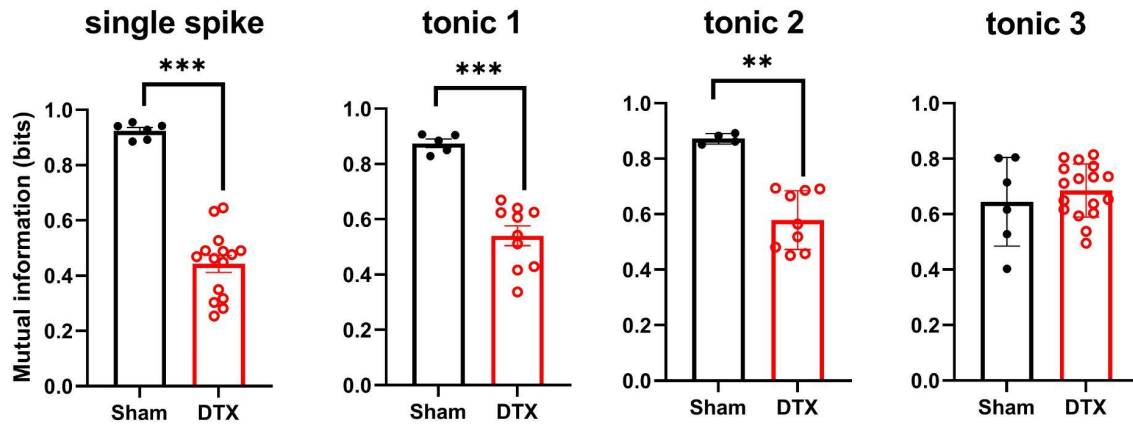

506

507 **Fig. 5. Mutual information (MI) between spike trains by cell type.** MI between control spike  
508 trains and spike trains following sham solution change was high (black markers, bars) indicating high  
509 similarity. In contrast, MI between spike trains from control versus DTX trials was significantly lower for  
510 single-spike, tonic I, and tonic II neurons but not for tonic III neurons (Mann-Whitney test,  $P < 0.001$ ,  $P <$   
511  $0.001$ ,  $P = 0.003$  and  $P = 0.707$ , respectively).

512

513

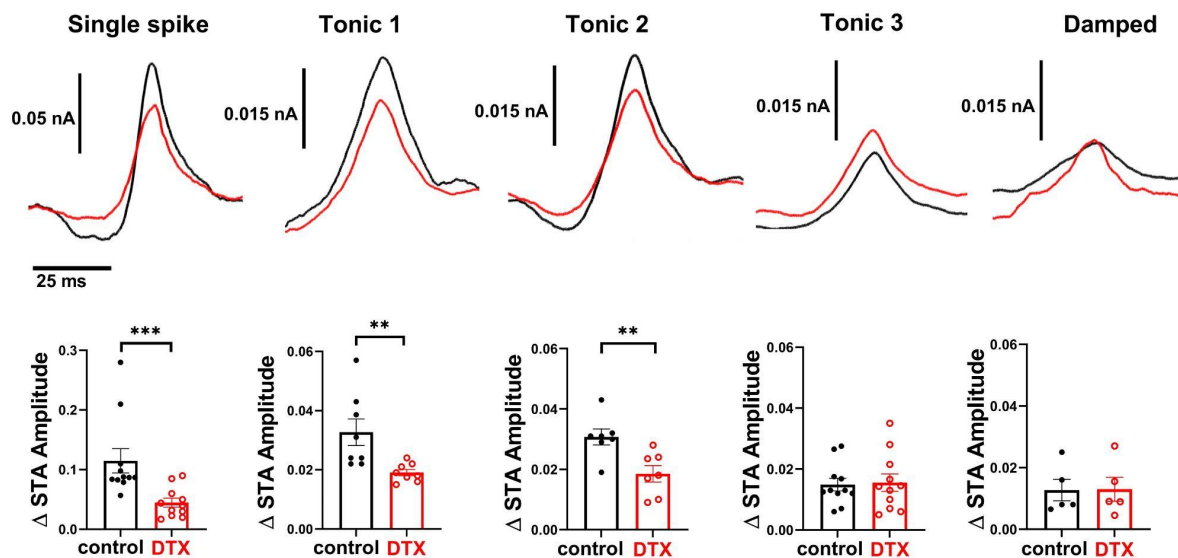

514

515 **Fig. 6. DTX reduced the high-pass response selectivity in a subset of NA neurons.** Top row:  
516 spike-triggered averages (STA) for each neuron type before (black traces) and after (red traces) DTX  
517 application. Traces are grand averages of the population for each cell type. Bottom row: summary  
518 statistics of peak-to-trough amplitude of STA waveforms from individual neurons. STA amplitudes were  
519 significantly reduced in the presence of DTX for single-spiking, tonic I, and tonic II neurons ( $P < 0.001$ ,  $P$   
520  $= 0.036$ ,  $P = 0.014$ , respectively, Wilcoxon's t-test). Tonic III and damped neuron STAs were unchanged.

521

522

523

524

525

526

527

528

529

530

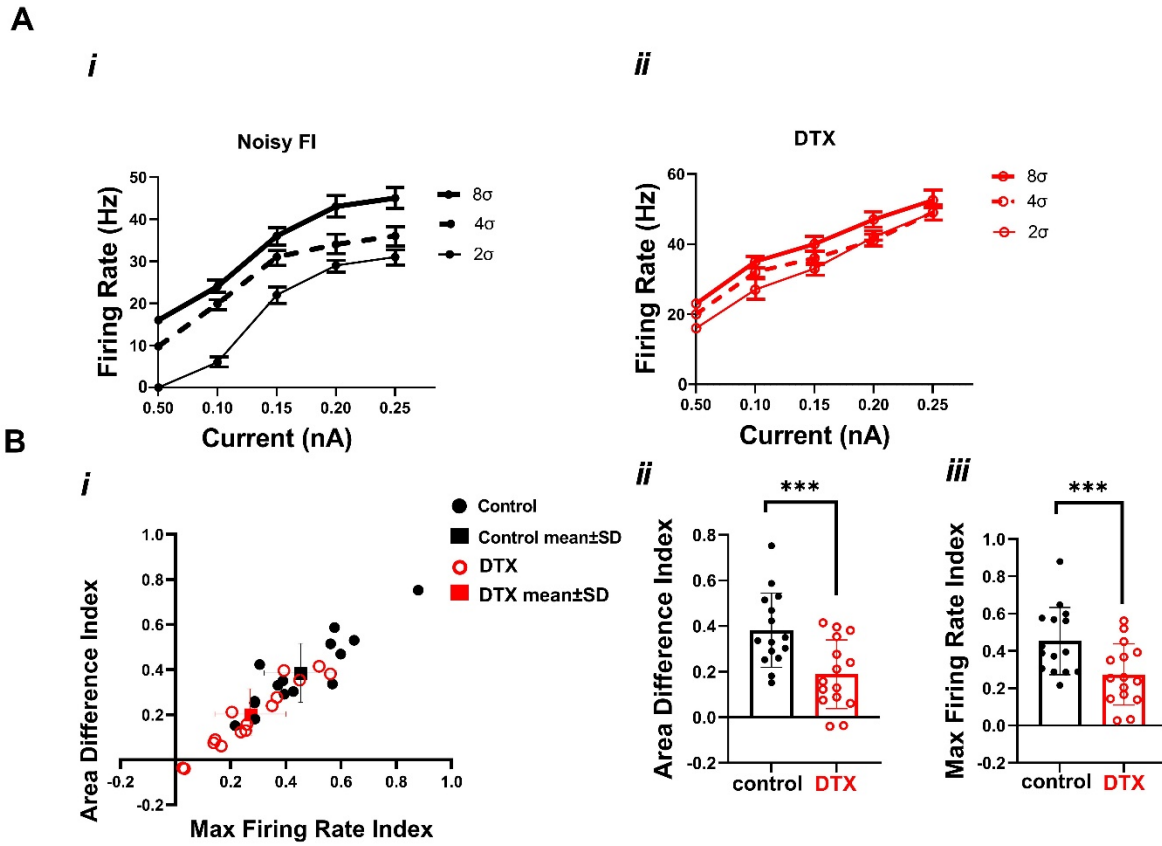

531

532 **Fig. 7. DTX diminished fluctuation sensitivity in differentiators.** (A) An example of one  
533 differentiator neuron's input-output function with 3 levels of noise before (*i*) and after DTX application  
534 (*ii*). (B) Summary plot of f-I curve metrics for 15 differentiator neurons (*Bi*, black solid and red open  
535 markers represent before and after pairs; square markers with error bars are group mean±SD). (*Bii*) Area  
536 Difference Index (control ADI =  $0.391 \pm 0.17$ , DTX ADI =  $0.187 \pm 0.15$ ) and (*Biii*) maximum firing rate  
537 index (control  $\Delta_{\text{maxFR}} = 0.422 \pm 0.19$ , DTX  $\Delta_{\text{maxFR}} = 0.261 \pm 0.15$ ) are reduced upon DTX application.

538

539

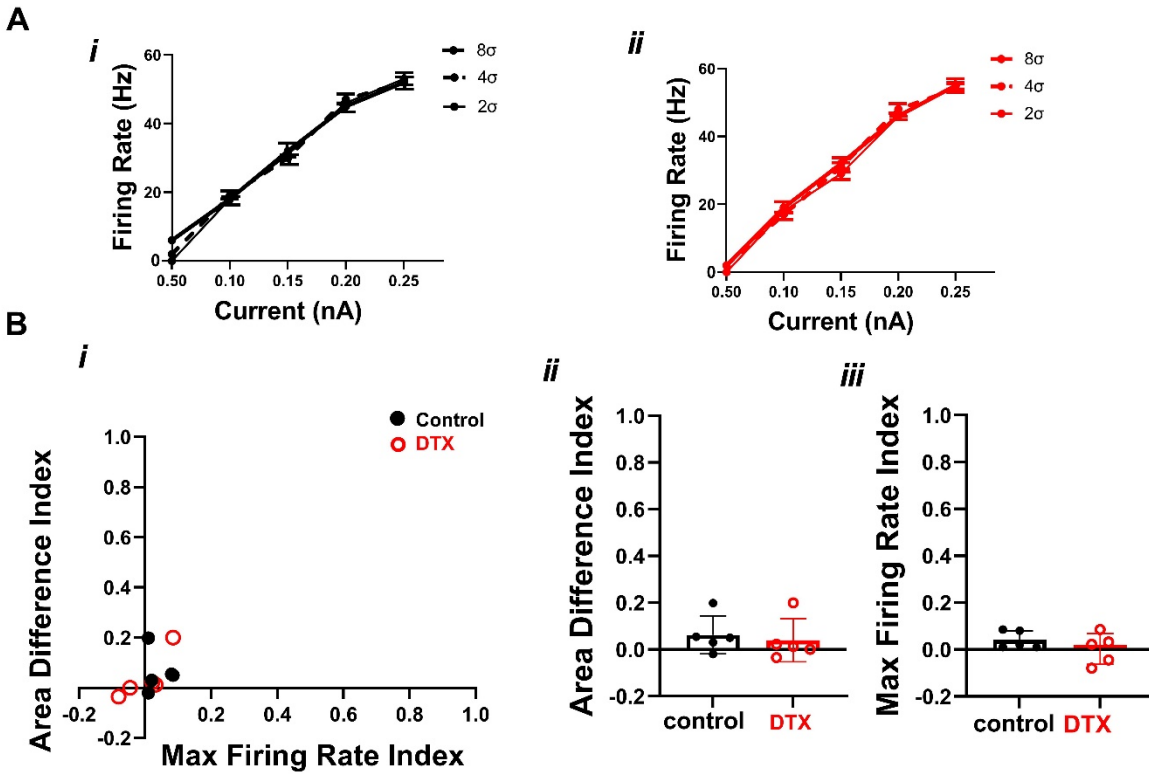

540

541 **Fig. 8. DTX had no impact on fluctuation sensitivity metrics in integrators. Panels as in Fig. 9.**

542 An example of one integrator neuron's input-output function with 3 levels of noise before (A*i*) and after DTX

543 application (A*ii*). (B) Summary plot of f-I curve metrics for 5 integrators neurons indicated no DTX effects. (B*ii*) Area

544 Difference Index (control ADI =  $0.042 \pm 0.14$ , DTX ADI =  $0.032 \pm 0.025$ ) and (B*iii*) maximum firing rate index

545 (control  $\Delta_{\text{maxFR}} = 0.036 \pm 0.017$ , DTX  $\Delta_{\text{maxFR}} = 0.008 \pm 0.072$ ) show no changes with DTX.

546



547

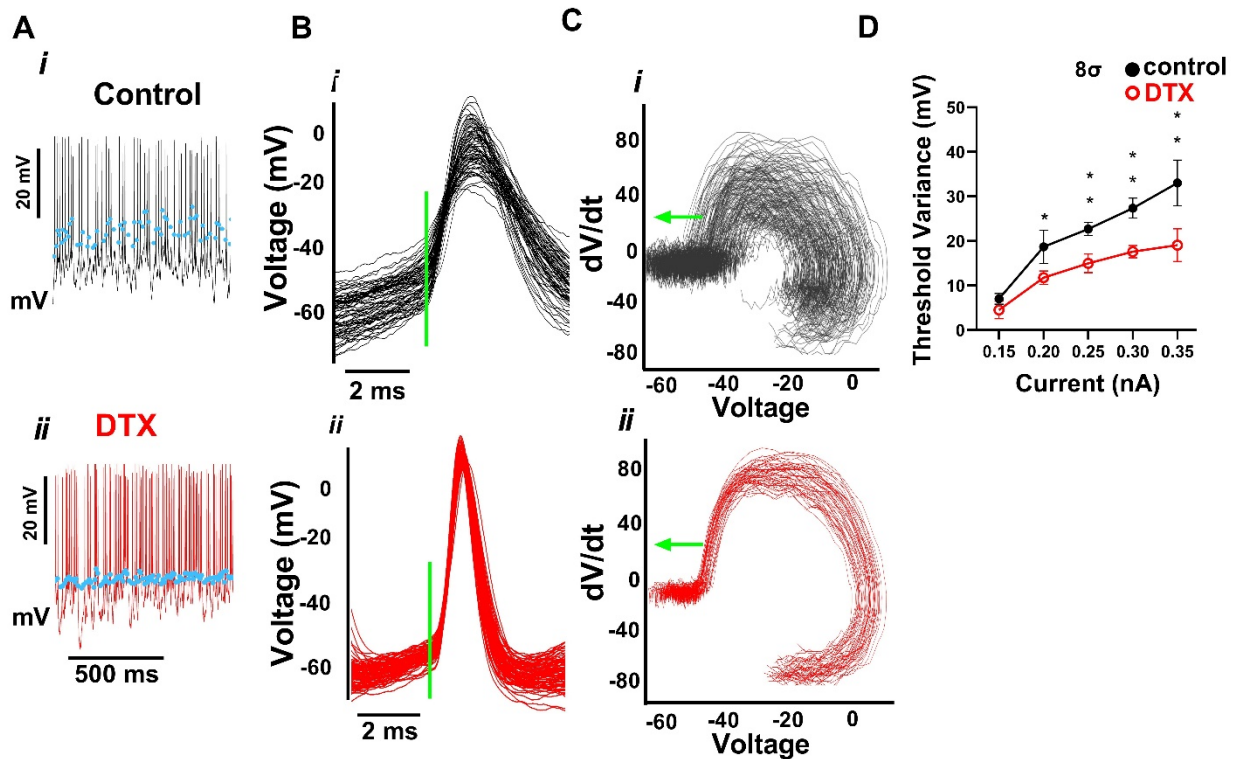

548

549

550 **Figure 9 DTX altered the dynamics of action potential initiation and threshold variability**  
551 **during periods of high current fluctuation** (A) Example spike trains with spike thresholds indicated by  
552 blue dots in a control (i) and post-DTX application (ii). (B) Action potentials overlaid for control (i) and  
553 DTX (ii) trials aligned on spike threshold (green bar). (C) Voltage derivative versus voltage for APs in  
554 panel B for control (i) and DTX (ii).  $dV/dt$  threshold is labeled with a green arrow. (D) Threshold  
555 variability was significantly diminished in the  $8\sigma$  noise fluctuation level from 0.2 nA and greater (2-way  
556 ANOVA, main effect by drug,  $[F(20, 345)= 10.95, P=0.001]$ ; 0.2 nA:  $P = 0.0085$ ; 0.25 nA:  $P = 0.0041$ ; 0.3  
557 nA:  $P=0.001$ ; 0.35 nA:  $P = 0.001$ ; Sidak's multiple comparisons test).

558

559

## 560 References

561

- 562 1. Carr CE, Soares D. Evolutionary convergence and shared computational principles in the auditory  
563 system. *Brain Behav Evol* 59: 294–311, 2002. doi: 10.1159/000063565.
- 564 2. Sachs MB, Sinnott JM. Responses to tones of single cells in nucleus magnocellularis and nucleus  
565 angularis of the redwing blackbird (*Agelaius phoeniceus*). *J Comp Physiol A* 126: 347-361, 1978.
- 566 3. Sullivan W, Konishi M. Segregation of stimulus phase and intensity coding in the cochlear nucleus of  
567 the barn owl. *J Neurosci* 4: 1787–1799, 1984. doi: 10.1523/jneurosci.04-07-01787.1984.
- 568 4. Raman IM, Trussell LO. The kinetics of the response to glutamate and kainate in neurons of the avian  
569 cochlear nucleus. *Neuron* 9: 173–186, 1992. doi: 10.1016/0896-6273(92)90232-3.
- 570 5. Rathouz M, Trussell L. Characterization of outward currents in neurons of the avian nucleus  
571 magnocellularis. *J Neurophysiol* 80: 2824–2835, 1998. doi: 10.1152/jn.1998.80.6.2824.
- 572 6. Reyes AD, Rubel EW, Spain WJ. Membrane properties underlying the firing of neurons in the avian  
573 cochlear nucleus. *J Neurosci* 14: 5352–5364, 1994.
- 574 7. Sanchez JT, Quinones K, Otto-Meyer S. Factors Influencing Short-term Synaptic Plasticity in the Avian  
575 Cochlear Nucleus Magnocellularis. *J Exp Neurosci* 9: 11–24, 2015. doi: 10.4137/jen.s25472.
- 576 8. Ohmori H. Neuronal specializations for the processing of interaural difference cues in the chick. *Front*  
577 *Neural Circuit* 8: 47, 2014. doi: 10.3389/fncir.2014.00047.
- 578 9. Akter N, Adachi R, Kato A, Fukaya R, Kuba H. Auditory Input Shapes Tonotopic Differentiation of Kv1.1  
579 Expression in Avian Cochlear Nucleus during Late Development. *J Neurosci* 38: 2967–2980, 2018. doi:  
580 10.1523/jneurosci.2472-17.2018.
- 581 10. Lu Y, Monsivais P, Tempel BL, Rubel EW. Activity-dependent regulation of the potassium channel  
582 subunits Kv1.1 and Kv3.1. *J Comp Neurol* 470: 93–106, 2004. doi: 10.1002/cne.11037.
- 583 11. Koyano K, Funabiki K, Ohmori H. Voltage-gated ionic currents and their roles in timing coding in  
584 auditory neurons of the nucleus magnocellularis of the chick. *Neurosci Res* 26: 29–45, 1996. doi:  
585 10.1016/0168-0102(96)01071-1.
- 586 12. Manis PB, Marx SO. Outward currents in isolated ventral cochlear nucleus neurons. *J Neurosci* 11:  
587 2865–2880, 1991. doi: 10.1523/jneurosci.11-09-02865.1991.
- 588 13. Wu SH, Oertel D. Intracellular injection with horseradish peroxidase of physiologically characterized  
589 stellate and bushy cells in slices of mouse anteroventral cochlear nucleus. *J Neurosci* 4: 1577–1588,  
590 1984. doi: 10.1523/jneurosci.04-06-01577.1984.

- 591 14. Brew HM, Forsythe ID. Two voltage-dependent K<sup>+</sup> conductances with complementary functions in  
592 postsynaptic integration at a central auditory synapse. *J Neurosci* 15: 8011–8022, 1995.
- 593 15. Johnston J, Forsythe ID, Kopp-Scheinflug C. Going native: voltage-gated potassium channels  
594 controlling neuronal excitability. *J Physiol* 588: 3187–3200, 2010. doi: 10.1113/jphysiol.2010.191973.
- 595 16. Konishi M, Sullivan WE, Takahashi T. The owl's cochlear nuclei process different sound localization  
596 cues. *J Acoust Soc Am* 78: 360–364, 1985. doi: 10.1121/1.392499.
- 597 17. Takahashi TT, Konishi M. Projections of the cochlear nuclei and nucleus laminaris to the inferior  
598 colliculus of the barn owl. *J Comp Neurol* 274: 190–211, 1988. doi: 10.1002/cne.902740206.
- 599 18. Viète S, Peña JL, Konishi M. Effects of Interaural Intensity Difference on the Processing of Interaural  
600 Time Difference in the Owl's Nucleus Laminaris. *J Neurosci* 17: 1815–1824, 1997. doi:  
601 10.1523/jneurosci.17-05-01815.1997.
- 602 19. Fontaine B, MacLeod KM, Lubejko ST, Steinberg LJ, Köppl C, Peña JL. Emergence of band-pass  
603 filtering through adaptive spiking in the owl's cochlear nucleus. *J Neurophysiol* 112: 430–445, 2014. doi:  
604 10.1152/jn.00132.2014.
- 605 20. Steinberg LJ, Peña JL. Difference in Response Reliability Predicted by Spectrotemporal Tuning in the  
606 Cochlear Nuclei of Barn Owls. *J Neurosci* 31: 3234–3242, 2011. doi: 10.1523/jneurosci.5422-10.2011.
- 607 21. Soares D, Carr CE. The cytoarchitecture of the nucleus angularis of the barn owl (*Tyto alba*). *J Comp*  
608 *Neurol* 429: 192–205, 2001.
- 609 22. Fukui I, Ohmori H. Developmental changes in membrane excitability and morphology of neurons in  
610 the nucleus angularis of the chicken. *J Physiol* 548: 219–232, 2003. doi: 10.1113/jphysiol.2002.036285.
- 611 23. Warchol ME, Dallos P. Neural coding in the chick cochlear nucleus. *J Comp Physiol* 166: 721–734,  
612 1990. doi: 10.1007/bf00240021.
- 613 24. Köppl C, Carr CE. Computational Diversity in the Cochlear Nucleus Angularis of the Barn Owl. *J*  
614 *Neurophysiol* 89: 2313–2329, 2003. doi: 10.1152/jn.00635.2002.
- 615 25. Soares D, Chitwood RA, Hyson RL, Carr CE. Intrinsic Neuronal Properties of the Chick Nucleus  
616 Angularis. *J Neurophysiol* 88: 152–162, 2002. doi: 10.1152/jn.2002.88.1.152.
- 617 26. Kreeger LJ, Arshed A, MacLeod KM. Intrinsic firing properties in the avian auditory brain stem allow  
618 both integration and encoding of temporally modulated noisy inputs in vitro. *J Neurophysiol* 108: 2794–  
619 2809, 2012. doi: 10.1152/jn.00092.2012.
- 620 27. Ahn J, Kreeger LJ, Lubejko ST, Butts DA, MacLeod KM. Heterogeneity of intrinsic biophysical  
621 properties among cochlear nucleus neurons improves the population coding of temporal information. *J*  
622 *Neurophysiol* 111: 2320–2331, 2014. doi: 10.1152/jn.00836.2013.

- 623 28. Lubejko ST, Fontaine B, Soueidan SE, MacLeod KM. Spike threshold adaptation diversifies neuronal  
624 operating modes in the auditory brain stem. *J Neurophysiol* 122: 2576–2590, 2019. doi:  
625 10.1152/jn.00234.2019.
- 626 29. Brown DH, Hyson RL. Intrinsic physiological properties underlie auditory response diversity in the  
627 avian cochlear nucleus. *J Neurophysiol* 121: 908–927, 2019. doi: 10.1152/jn.00459.2018.
- 628 30. Bloom S, Williams A, MacLeod KM. Heterogeneous calretinin expression in the avian cochlear  
629 nucleus angularis. *J Assoc Res Otolaryngology* 15: 603–620, 2014. doi: 10.1007/s10162-014-0453-0.
- 630 31. Platkiewicz J, Brette R. A threshold equation for action potential initiation. *PLoS Comput Biol* 6:  
631 e1000850, 2010. doi: 10.1371/journal.pcbi.1000850.
- 632 32. Higgs MH, Spain WJ. Kv1 channels control spike threshold dynamics and spike timing in cortical  
633 pyramidal neurones. *J Physiol* 589: 5125–5142, 2011. doi: 10.1113/jphysiol.2011.216721.
- 634 33. Ratté S, Lankarany M, Rho Y-A, Patterson A, Prescott SA. Subthreshold membrane currents confer  
635 distinct tuning properties that enable neurons to encode the integral or derivative of their input. *Front*  
636 *Cell Neurosci* 8: 452, 2015. doi: 10.3389/fncel.2014.00452.
- 637 34. Prescott SA, Ratté S, Koninck YD, Sejnowski TJ. Pyramidal Neurons Switch From Integrators In Vitro  
638 to Resonators Under In Vivo-Like Conditions. *J Neurophysiol* 100: 3030–3042, 2008. doi:  
639 10.1152/jn.90634.2008.
- 640 35. Joris PX, Louage DH, Cardoen L, Heijden M van der. Correlation index: a new metric to quantify  
641 temporal coding. *Hearing Res* 216–217: 19–30, 2006. doi: 10.1016/j.heares.2006.03.010.
- 642 36. Street SE, Manis PB. Action potential timing precision in dorsal cochlear nucleus pyramidal cells. *J*  
643 *Neurophysiol* 97: 4162–4172, 2007. doi: 10.1152/jn.00469.2006.
- 644 37. Steveninck RR de R van, Lewen GD, Strong SP, Koberle R, Bialek W. Reproducibility and variability in  
645 neural spike trains. *Science* 275: 1805–1808, 1997. doi: 10.1126/science.275.5307.1805.
- 646 38. Shannon CE. A Mathematical Theory of Communication. *Bell Syst Technical J* 27: 379–423, 1948. doi:  
647 10.1002/j.1538-7305.1948.tb01338.x.
- 648 39. Higgs MH, Slee SJ, Spain WJ. Diversity of gain modulation by noise in neocortical neurons: regulation  
649 by the slow afterhyperpolarization conductance. *J Neurosci* 26: 8787–8799, 2006. doi:  
650 10.1523/jneurosci.1792-06.2006.
- 651 40. Lundstrom BN, Famulare M, Sorensen LB, Spain WJ, Fairhall AL. Sensitivity of firing rate to input  
652 fluctuations depends on time scale separation between fast and slow variables in single neurons. *J*  
653 *Comput Neurosci* 27: 277–290, 2009. doi: 10.1007/s10827-009-0142-x.
- 654 41. Mensi S, Hagens O, Gerstner W, Pozzorini C. Enhanced Sensitivity to Rapid Input Fluctuations by  
655 Nonlinear Threshold Dynamics in Neocortical Pyramidal Neurons. *PLoS Comput Biol* 12: e1004761, 2016.  
656 doi: 10.1371/journal.pcbi.1004761.

- 657 42. Svirskis G, Kotak V, Sanes DH, Rinzel J. Sodium Along With Low-Threshold Potassium Currents  
658 Enhance Coincidence Detection of Subthreshold Noisy Signals in MSO Neurons. *J Neurophysiol* 91: 2465–  
659 2473, 2004. doi: 10.1152/jn.00717.2003.
- 660 43. Dodson PD, Billups B, Rusznák Z, Szûcs G, Barker MC, Forsythe ID. Presynaptic rat Kv1.2 channels  
661 suppress synaptic terminal hyperexcitability following action potential invasion. *J Physiol* 550: 27–33,  
662 2003. doi: 10.1113/jphysiol.2003.046250.
- 663 44. Parameshwaran S, Carr CE, Perney TM. Expression of the Kv3.1 Potassium Channel in the Avian  
664 Auditory Brainstem. *J Neurosci* 21: 485–494, 2001. doi: 10.1523/jneurosci.21-02-00485.2001.
- 665 45. Wang LY, Gan L, Forsythe ID, Kaczmarek LK. Contribution of the Kv3.1 potassium channel to high-  
666 frequency firing in mouse auditory neurones. *J Physiology* 509 ( Pt 1): 183–194, 1998. doi:  
667 10.1111/j.1469-7793.1998.183bo.x.
- 668 46. Choudhury N, Linley D, Richardson A, Anderson M, Robinson SW, Marra V, Ciampani V, Walter SM,  
669 Kopp-Scheinflug C, Steinert JR, Forsythe ID. Kv3.1 and Kv3.3 subunits differentially contribute to Kv3  
670 channels and action potential repolarization in principal neurons of the auditory brainstem. *J Physiol*  
671 598: 2199–2222, 2020. doi: 10.1113/jp279668.
- 672 47. Kuba H, Koyano K, Ohmori H. Development of membrane conductance improves coincidence  
673 detection in the nucleus laminaris of the chicken. *J Physiol* 540: 529–542, 2002. doi:  
674 10.1113/jphysiol.2001.013365.
- 675 48. Kuba H. Cellular and molecular mechanisms of avian auditory coincidence detection. *Neurosci Res*  
676 59: 370–376, 2007. doi: 10.1016/j.neures.2007.08.003.
- 677 49. Zhang S, Trussell LO. A characterization of excitatory postsynaptic potentials in the avian nucleus  
678 magnocellularis. *J Neurophysiol* 72: 705–718, 1994. doi: 10.1152/jn.1994.72.2.705.
- 679 50. Fukui I, Ohmori H. Tonotopic gradients of membrane and synaptic properties for neurons of the  
680 chicken nucleus magnocellularis. *J Neurosci* 24: 7514–7523, 2004. doi: 10.1523/jneurosci.0566-04.2004.
- 681 51. Yang L, Monsivais P, Rubel EW. The superior olivary nucleus and its influence on nucleus laminaris: a  
682 source of inhibitory feedback for coincidence detection in the avian auditory brainstem. *J Neurosci* 19:  
683 2313–2325, 1999.
- 684 52. Ashida G, Tollin DJ, Kretzberg J. Physiological models of the lateral superior olive. *PLoS Comput Biol*  
685 13: e1005903, 2017. doi: 10.1371/journal.pcbi.1005903.
- 686 53. Reyes AD, Rubel EW, Spain WJ. In vitro analysis of optimal stimuli for phase-locking and time-  
687 delayed modulation of firing in avian nucleus laminaris neurons. *J Neurosci* 16: 993–1007, 1996.
- 688 54. Nishino E, Yamada R, Kuba H, Hioki H, Furuta T, Kaneko T, Ohmori H. Sound-Intensity-Dependent  
689 Compensation for the Small Interaural Time Difference Cue for Sound Source Localization. *J Neurosci* 28:  
690 7153–7164, 2008. doi: 10.1523/jneurosci.4398-07.2008.

- 691 55. Kuba H, Yamada R, Fukui I, Ohmori H. Tonotopic specialization of auditory coincidence detection in  
692 nucleus laminaris of the chick. *J Neurosci* 25: 1924–1934, 2005. doi: 10.1523/jneurosci.4428-04.2005.
- 693 56. Carr CE, Konishi M. A circuit for detection of interaural time differences in the brain stem of the barn  
694 owl. *J Neurosci* 10: 3227–3246, 1990.
- 695 57. Golding NL, Robertson D, Oertel D. Recordings from slices indicate that octopus cells of the cochlear  
696 nucleus detect coincident firing of auditory nerve fibers with temporal precision. *J Neurosci* 15: 3138–  
697 3153, 1995.
- 698 58. Khurana S, Remme MWH, Rinzel J, Golding NL. Dynamic Interaction of Ih and IK-LVA during Trains of  
699 Synaptic Potentials in Principal Neurons of the Medial Superior Olive. *J Neurosci* 31: 8936–8947, 2011.  
700 doi: 10.1523/jneurosci.1079-11.2011.
- 701 59. Khurana S, Liu Z, Lewis AS, Rosa K, Chetkovich D, Golding NL. An essential role for modulation of  
702 hyperpolarization-activated current in the development of binaural temporal precision. *J Neurosci* 32:  
703 2814–2823, 2012. doi: 10.1523/jneurosci.3882-11.2012.
- 704 60. Matthews G, Fuchs P. The diverse roles of ribbon synapses in sensory neurotransmission. *Nat Rev*  
705 *Neurosci* 11: 812–822, 2010. doi: 10.1038/nrn2924.
- 706 61. Svirskis G, Kotak V, Sanes DH, Rinzel J. Enhancement of signal-to-noise ratio and phase locking for  
707 small inputs by a low-threshold outward current in auditory neurons. *J Neurosci* 22: 11019–11025, 2002.
- 708 62. Kuznetsova MS, Higgs MH, Spain WJ. Adaptation of firing rate and spike-timing precision in the avian  
709 cochlear nucleus. *J Neurosci* 28: 11906–11915, 2008. doi: 10.1523/jneurosci.3827-08.2008.
- 710 63. Hodgkin AL, Huxley AF. A quantitative description of membrane current and its application to  
711 conduction and excitation in nerve. *J Physiology* 117: 500–544, 1952. doi:  
712 10.1113/jphysiol.1952.sp004764.
- 713 64. Huang C, Resnik A, Celikel T, Englitz B. Adaptive Spike Threshold Enables Robust and Temporally  
714 Precise Neuronal Encoding. *PLoS Comput Biol* 12: e1004984, 2016. doi: 10.1371/journal.pcbi.1004984.
- 715 65. Kobayashi R, Kitano K. Impact of slow K<sup>+</sup> currents on spike generation can be described by an  
716 adaptive threshold model. *J Comput Neurosci* 40: 347–362, 2016. doi: 10.1007/s10827-016-0601-0.
- 717 66. Monsivais P, Rubel EW. Accommodation enhances depolarizing inhibition in central neurons. *J*  
718 *Neurosci* 21: 7823–7830, 2001.
- 719 67. Howard MA, Rubel EW. Dynamic spike thresholds during synaptic integration preserve and enhance  
720 temporal response properties in the avian cochlear nucleus. *J Neurosci* 30: 12063–12074, 2010. doi:  
721 10.1523/jneurosci.1840-10.2010.
- 722 68. Oertel D. Encoding of Timing in the Brain Stem Auditory Nuclei of Vertebrates. *Neuron* 19: 959–962,  
723 1997. doi: 10.1016/s0896-6273(00)80388-8.

- 724 69. Oertel D, Wright S, Cao X-J, Ferragamo M, Bal R. The multiple functions of T  
725 stellate/multipolar/chopper cells in the ventral cochlear nucleus. *Hearing Res* 276: 61–69, 2011. doi:  
726 10.1016/j.heares.2010.10.018.
- 727 70. Rhode WS, Oertel D, Smith PH. Physiological response properties of cells labeled intracellularly with  
728 horseradish peroxidase in cat ventral cochlear nucleus. *J Comp Neurol* 213: 448–463, 1983. doi:  
729 10.1002/cne.902130408.
- 730 71. Palmer AR, Wallace MN, Arnott RH, Shackleton TM. Morphology of physiologically characterised  
731 ventral cochlear nucleus stellate cells. *Exp Brain Res* 153: 418–426, 2003. doi: 10.1007/s00221-003-  
732 1602-6.
- 733 72. Xie R, Manis PB. Synaptic transmission at the endbulb of Held deteriorates during age-related  
734 hearing loss. *J Physiology* 595: 919–934, 2017. doi: 10.1113/jp272683.
- 735 73. Rhode WS, Greenberg S. Encoding of amplitude modulation in the cochlear nucleus of the cat. *J*  
736 *Neurophysiol* 71: 1797–1825, 1994. doi: 10.1152/jn.1994.71.5.1797.
- 737 74. Frisina RD, Smith RL, Chamberlain SC. Encoding of amplitude modulation in the gerbil cochlear  
738 nucleus: II. Possible neural mechanisms. *Hearing Res* 44: 123–141, 1990. doi: 10.1016/0378-  
739 5955(90)90075-z.
- 740 75. Oertel D, Wu SH, Garb MW, Dizack C. Morphology and physiology of cells in slice preparations of the  
741 posteroventral cochlear nucleus of mice. *J Comp Neurol* 295: 136–154, 1990. doi:  
742 10.1002/cne.902950112.
- 743 76. Ferragamo MJ, Golding NL, Oertel D. Synaptic inputs to stellate cells in the ventral cochlear nucleus. *J*  
744 *Neurophysiol* 79: 51–63, 1998. doi: 10.1152/jn.1998.79.1.51.
- 745 77. McGinley MJ, Oertel D. Rate thresholds determine the precision of temporal integration in principal  
746 cells of the ventral cochlear nucleus. *Hearing Res* 216–217: 52–63, 2006. doi:  
747 10.1016/j.heares.2006.02.006.
- 748 78. Cao X-J, Oertel D. Auditory nerve fibers excite targets through synapses that vary in convergence,  
749 strength, and short-term plasticity. *J Neurophysiol* 104: 2308–2320, 2010. doi: 10.1152/jn.00451.2010.
- 750 79. Rothman JS, Manis PB. The roles potassium currents play in regulating the electrical activity of  
751 ventral cochlear nucleus neurons. *J Neurophysiol* 89: 3097–3113, 2003. doi: 10.1152/jn.00127.2002.
- 752 80. Rothman JS, Manis PB. Kinetic analyses of three distinct potassium conductances in ventral cochlear  
753 nucleus neurons. *J Neurophysiol* 89: 3083–3096, 2003. doi: 10.1152/jn.00126.2002.
- 754 81. Rothman JS, Manis PB. Differential expression of three distinct potassium currents in the ventral  
755 cochlear nucleus. *J Neurophysiol* 89: 3070–3082, 2003. doi: 10.1152/jn.00125.2002.
- 756 82. Ngodup T, Romero GE, Trussell LO. Identification of an inhibitory neuron subtype, the L-stellate cell  
757 of the cochlear nucleus. *Elife* 9: e54350, 2020. doi: 10.7554/elife.54350.

758 83. Ranjan R, Logette E, Marani M, Herzog M, Tâche V, Scantamburlo E, Buchillier V, Markram H. A  
759 Kinetic Map of the Homomeric Voltage-Gated Potassium Channel (Kv) Family. *Front Cell Neurosci* 13:  
760 358, 2019. doi: 10.3389/fncel.2019.00358.

761
